# Supplementary material for: Layered Double Hydroxide Nanoparticles to Overcome the Hydrophobicity of Ellagic Acid: An Antioxidant Hybrid Material
Source: PubMed Central journal article supplement (PMC7070634; doi:10.3390/antiox9020153), 2020-02-13
Supplement: antioxidants-09-00153-s001.pdf [file antioxidants-09-00153-s001.pdf]

Supplementary Materials

# **Layered Double Hydroxide Nanoparticles to Overcome the Hydrophobicity of Ellagic Acid: an Antioxidant Hybrid Material**

**Szabolcs Muráth<sup>1,2</sup>, Adél Szerlauth<sup>1</sup>, Dániel Sebők<sup>3</sup> and Istvan Szilagyi<sup>1,2,\*</sup>**

<sup>1</sup>MTA-SZTE Lendület Biocolloids Research Group, University of Szeged, H-6720 Szeged, Hungary; murathsz@chem.u-szeged.hu (S.M.); szerlauth.adel@gmail.com (A.S.); szistvan@chem.u-szeged.hu (I.S.)

<sup>2</sup>Interdisciplinary Excellence Center, Department of Physical Chemistry and Materials Science, University of Szeged, H-6720 Szeged, Hungary

<sup>3</sup>Interdisciplinary Excellence Center, Department of Applied and Environmental Chemistry, University of Szeged, H-6720 Szeged, Hungary; sebokd@chem.u-szeged.hu (D.S.)

\*Correspondence: szistvan@chem.u-szeged.hu; Tel: +36 62 343255

## Equations used for data evaluation

Bragg's law was used to calculate the basal spacing, i.e., the sum of the distance between two layers and the thickness of one layer in the LDH:

$$2d \cdot \sin\theta = n \cdot \lambda \quad (S1)$$

(d: basal spacing,  $\theta$ : incidence angle of X-rays, n: positive integer,  $\lambda$ : wavelength of X-rays).

For the (003), so-called first order reflection,  $n = 1$ .

The percentage of DPPH, which did not react in the samples, was provided by the Beer-Lambert correlation:

$$A = \varepsilon \cdot c \cdot \ell \text{ and DPPH (\%)} = \frac{c_{\text{final}}}{c_{\text{initial}}} \cdot 100\% = \frac{A_{\text{final}}}{A_{\text{initial}}} \cdot 100\% \quad (S2)$$

(A: absorbance,  $\varepsilon$ : molar extinction coefficient, c: molar concentration of DPPH,  $\ell$ : light path length).

The amount of DPPH scavenged by 1 mole of EA ( $N_{\text{DPPH}}$ ) was calculated by the following correlations:

$$EC'_{50} = \frac{EC_{50}}{c_{\text{EA,initial}}} \quad N_{\text{DPPH}} = \frac{1}{2 \cdot EC'_{50}} = \frac{1}{EC'_{100}} \quad (S3)$$

( $EC'_{50}$ : dimensionless effective concentration of EA,  $EC_{50}$ : effective concentration of EA,  $c_{\text{EA,initial}}$ : the initial concentration of EA in the DPPH test,  $EC'_{100}$ : dimensionless value of the theoretical amount of EA needed to neutralize every DPPH radical).

**Table S1.** The position of (003) diffraction peak and the corresponding basal spacing ( $d_0$ ) of the LDH prepared. The latter values were calculated with equation S1. Hydrodynamic radii in water ( $R_h$ , at 10 mg/L particle concentration) are also shown.

| Sample      | $2\theta$ (003) | $d_0$ (Å) | $R_h$ (nm) |
|-------------|-----------------|-----------|------------|
| LDH         | 11.73           | 7.54      | 96         |
| EA-LDH      | 11.40           | 7.76      | 286        |
| HT-EA-LDH   | 11.41           | 7.75      | 474        |
| MeOH-EA-LDH | 11.41           | 7.75      | 325        |
| EtOH-EA-LDH | 11.25           | 7.86      | 282        |
| AC-EA-LDH   | 11.57           | 7.65      | 299        |
| ACN-EA-LDH  | 11.41           | 7.75      | 400        |
| FA-EA-LDH   | 11.25           | 7.86      | 405        |
| DMF-EA-LDH  | 11.41           | 7.75      | 559        |

**Table S2.** Characteristic IR bands of the solids investigated.

| Wavenumber (cm <sup>-1</sup> ) | Assignment                                                               | Sample          |
|--------------------------------|--------------------------------------------------------------------------|-----------------|
| 3500–3300                      | OH str                                                                   | EA, LDH, EA–LDH |
| 3200–3000                      | CH str                                                                   | EA, EA–LDH      |
|                                | CC <sub>Ar</sub> ovrt                                                    |                 |
| 1719                           | C=O <sub>Lact</sub> str                                                  | EA              |
| 1652                           | COO <sub>as</sub> str                                                    | EA–LDH          |
| 1615, 1511                     | CC <sub>Ar</sub> str                                                     | EA, EA–LDH      |
| 1400–1300                      | COO <sub>sy</sub> str                                                    | EA–LDH          |
| 1357                           | EO str (in NO <sub>3</sub> <sup>-</sup> /CO <sub>3</sub> <sup>2-</sup> ) | LDH, EA–LDH     |
| 1350–1150                      | C–O <sub>Lact, Ph</sub> str                                              | EA, EA–LDH      |
| 1100–1000                      |                                                                          |                 |
| 1120–1100                      | OH bnd                                                                   | EA, EA–LDH      |
| 1100–1000                      | CH bnd                                                                   | EA, EA–LDH      |
|                                | CC <sub>Ar</sub>                                                         |                 |

str: stretching vibration, ovrt: overtones, as: asymmetric, sy: symmetric, bnd: bending vibration, Ar: aromatic, Lact: lactone bond, Ph: phenolic. Note: the presence of NO<sub>3</sub><sup>-</sup> may arise from precursors, while CO<sub>3</sub><sup>2-</sup> from airborne surface adsorption.

**Table S3.** EA content and specific surface area of the organic-modified LDH.

| Sample      | EA content (mass %) | BET specific surface area (m <sup>2</sup> g <sup>-1</sup> ) |
|-------------|---------------------|-------------------------------------------------------------|
| EA-LDH      | 17.1                | <10                                                         |
| HT-EA-LDH   | 18.9                | <10                                                         |
| MeOH-EA-LDH | 17.2                | 176                                                         |
| EtOH-EA-LDH | 16.6                | 239                                                         |
| AC-EA-LDH   | 17.2                | 79                                                          |
| ACN-EA-LDH  | 16.4                | 136                                                         |
| FA-EA-LDH   | 14.7                | <10                                                         |
| DMF-EA-LDH  | 16.9                | 223                                                         |

Note: the specific surface area of pristine LDH was 73 m<sup>2</sup>g<sup>-1</sup>.

1

**Table S4.** Released amount of EA (immobilized mass%) from the obtained EA-LDH hybrids at different desorption periods.

| Sample      | 5 mins | 10 mins | 20 mins | 40 mins | 60 mins |
|-------------|--------|---------|---------|---------|---------|
| EA-LDH      | 0.7    | 1.5     | 1.9     | 0.9     | 0.9     |
| HT-EA-LDH   | 1.1    | 0.9     | 1.0     | 1.1     | 1.0     |
| MeOH-EA-LDH | 2.3    | 2.4     | 2.4     | 2.4     | 2.4     |
| EtOH-EA-LDH | 2.4    | 2.4     | 2.4     | 2.7     | 2.4     |
| AC-EA-LDH   | 5.9    | 6.0     | 5.4     | 3.7     | 2.5     |
| ACN-EA-LDH  | 3.3    | 3.4     | 3.4     | 3.3     | 2.8     |
| FA-EA-LDH   | 2.2    | 2.2     | 2.4     | 2.7     | 2.8     |
| DMF-EA-LDH  | 2.1    | 2.3     | 2.4     | 2.7     | 2.9     |

2 Note: the leaked EA had negligible contribution to the measured antioxidant efficiencies.

3

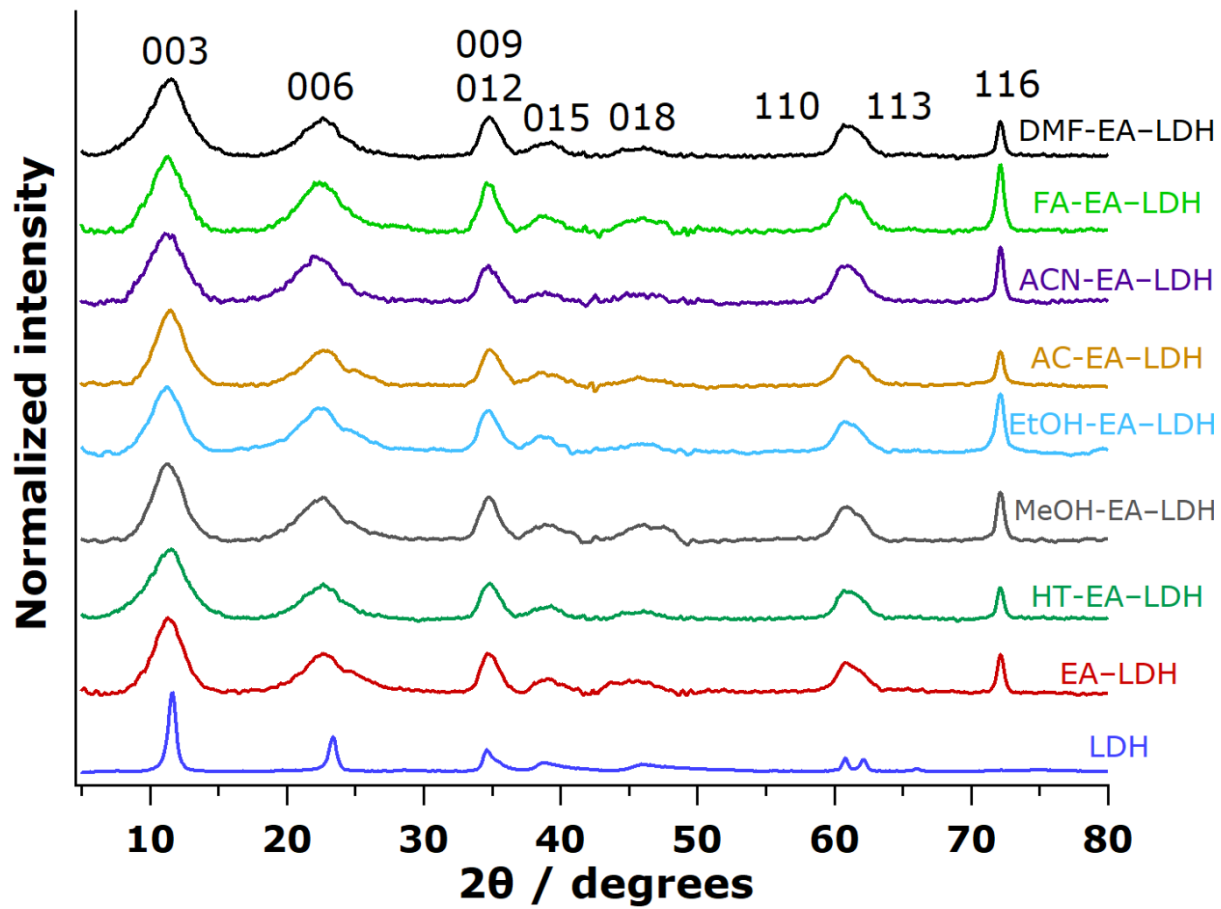

**Figure S1.** XRD pattern of the LDH and its composites prepared. The Miller indices are indicated.

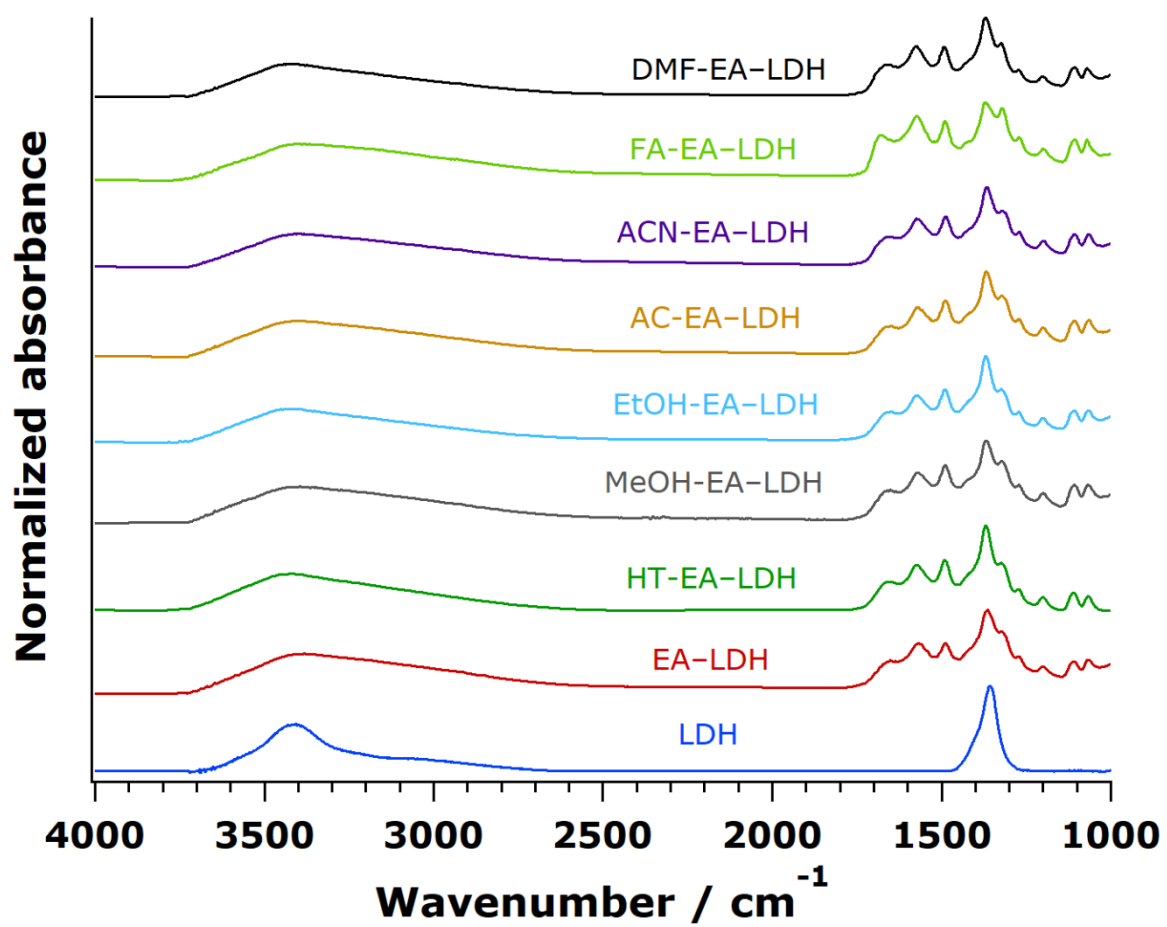

**Figure S2.** FT-IR spectra of the LDH, its EA-intercalated form and the hybrids modified with AMOS treatment.



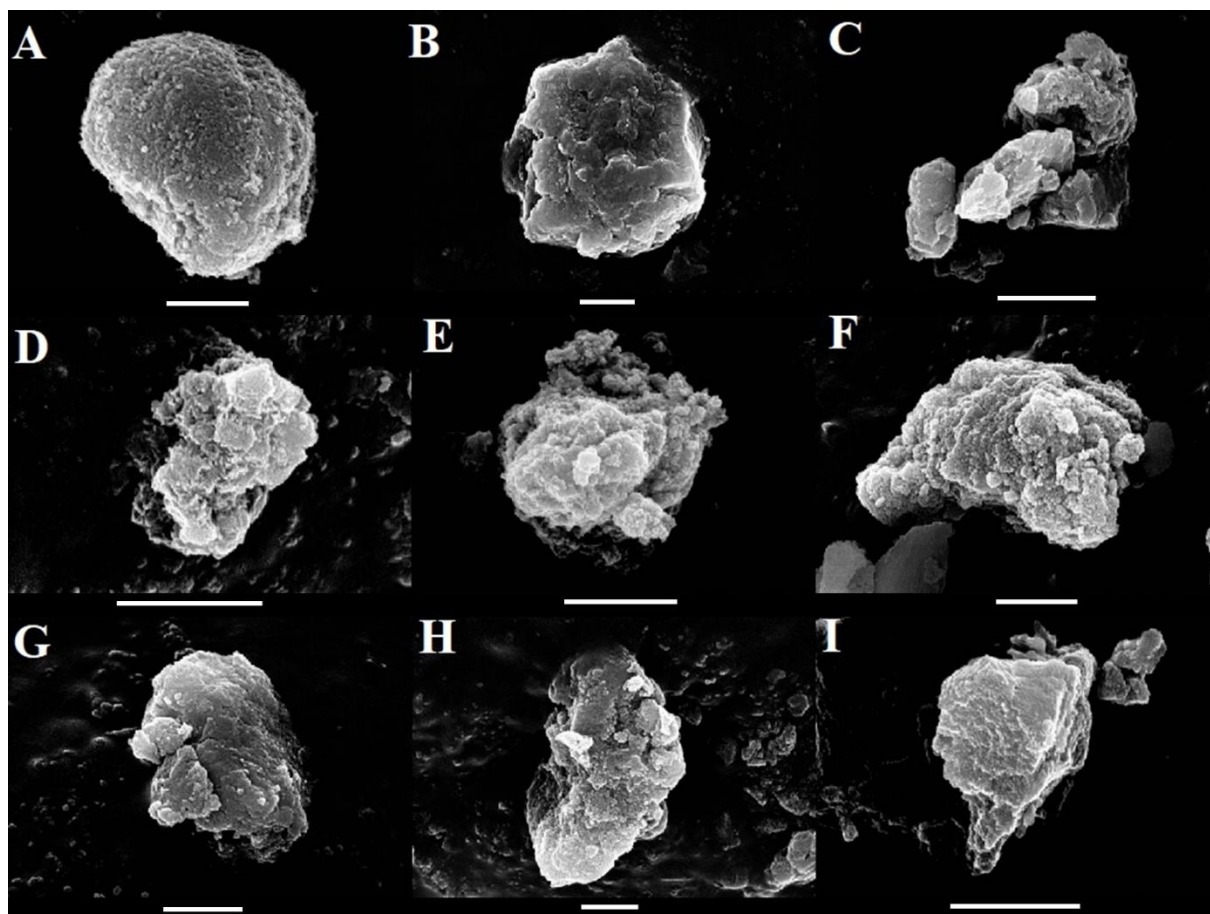

**Figure S3.** SEM micrograph of the LDH prepared: (A) LDH, (B) EA-LDH, (C) HT-EA-LDH, (D) MeOH-EA-LDH, (E) EtOH-EA-LDH, (F) AC-EA-LDH, (G) ACN-EA-LDH, (H) DMF-EA-LDH, (I) FA-EA-LDH. Scale bars represent 1  $\mu\text{m}$ .

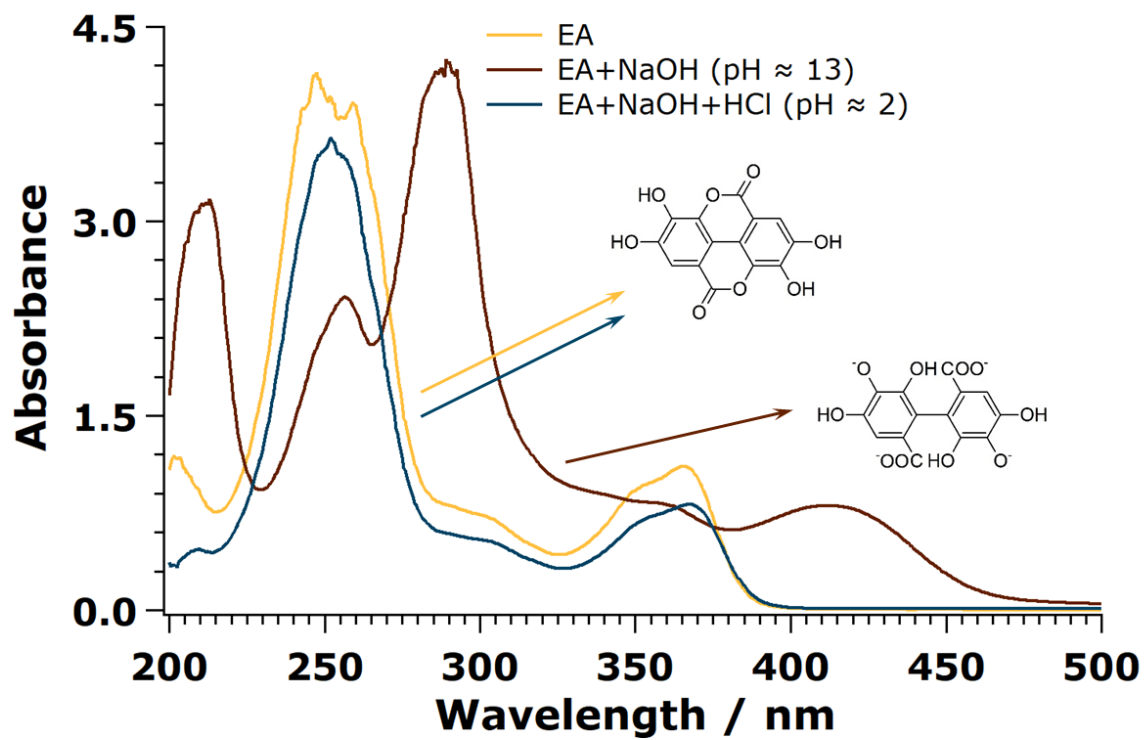

**Figure S4.** UV-Vis spectra of EA at different protonated states.

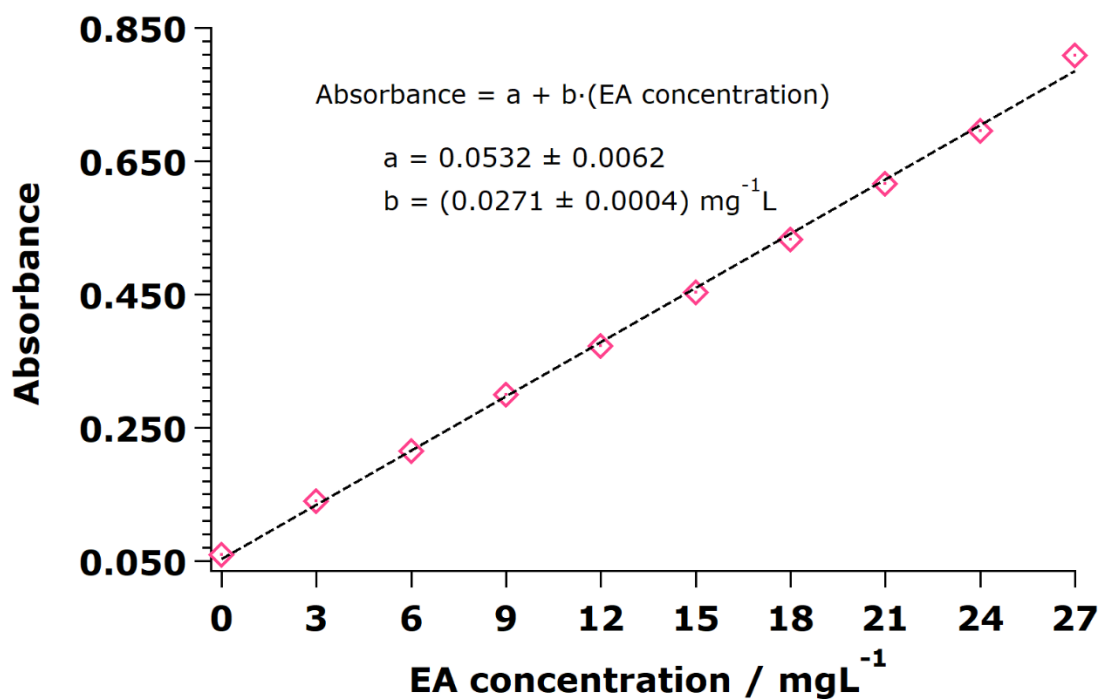

**Figure S5.** UV-Vis calibration curve of EA in 50 V% aqueous MeOH solution. The absorbance values were recorded at 350 nm.

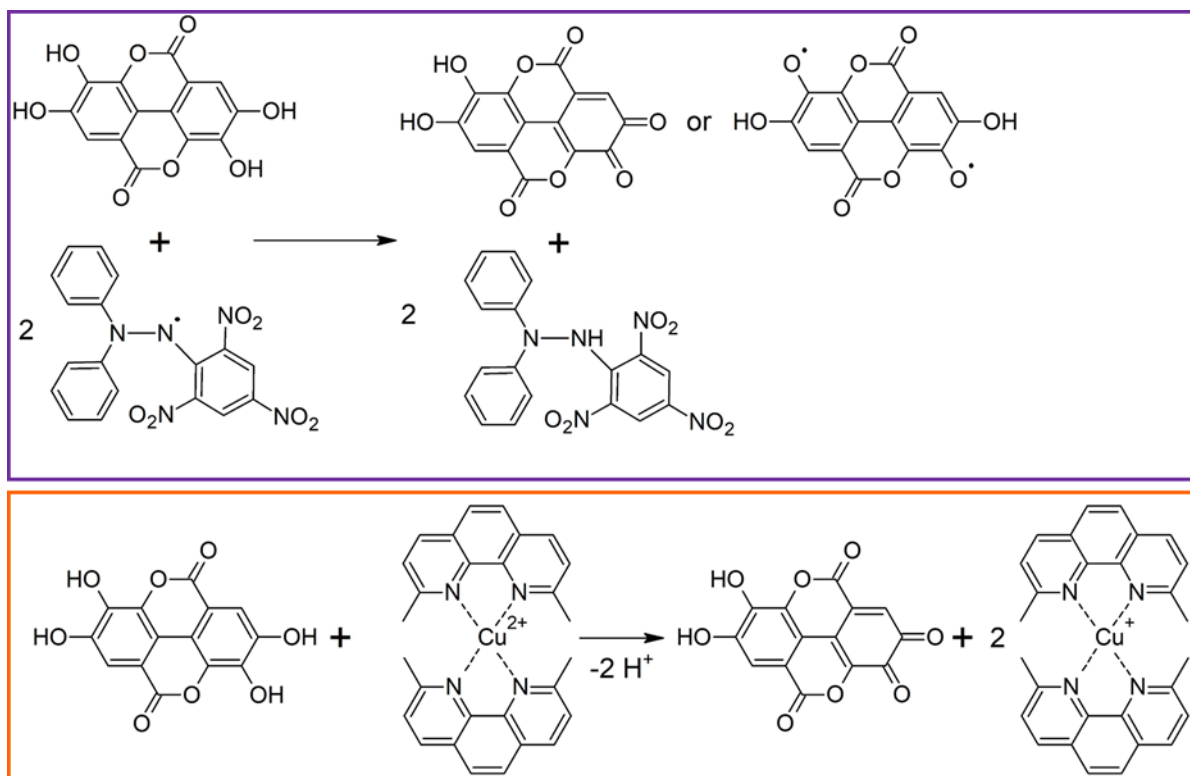

**Figure S6.** Reaction scheme between EA and DPPH (upper, purple border) and between EA and Cu(II)Nc<sub>2</sub> (bottom, orange border) involving 2 -OH groups

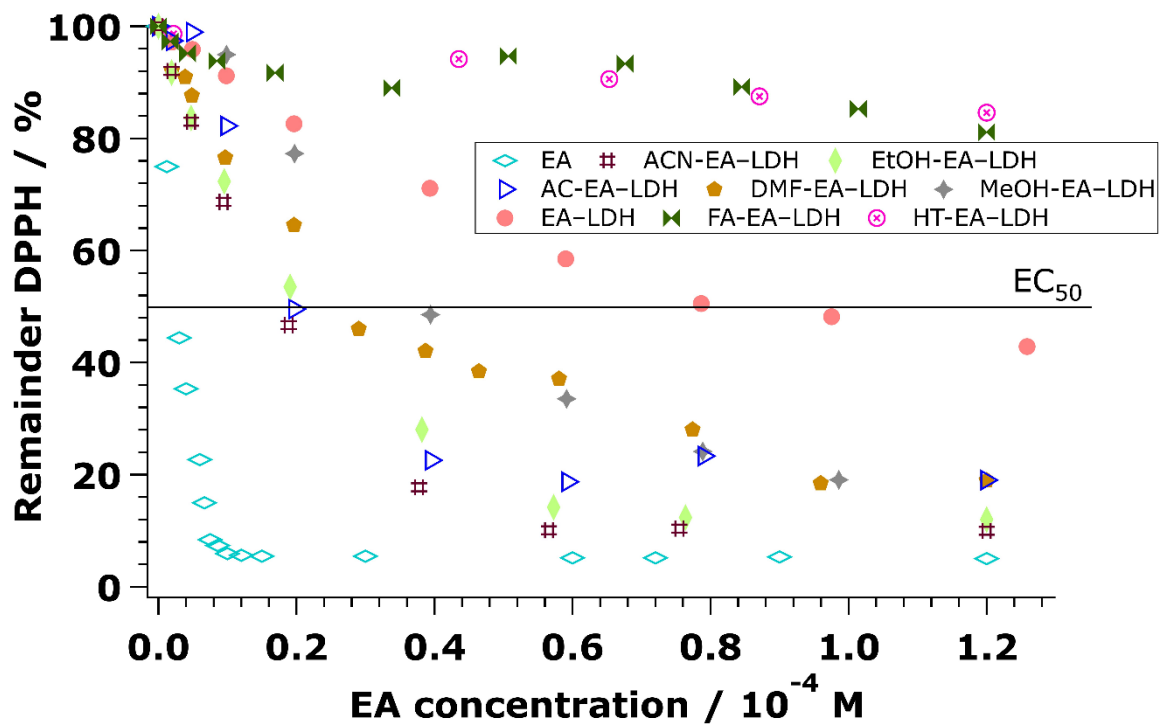

**Figure S7.** Percentage of remaining (non-reacted) DPPH at steady-state as a function of the EA concentration applied. Data measured for all of the composites are shown. Measurements have an error of about 3%.

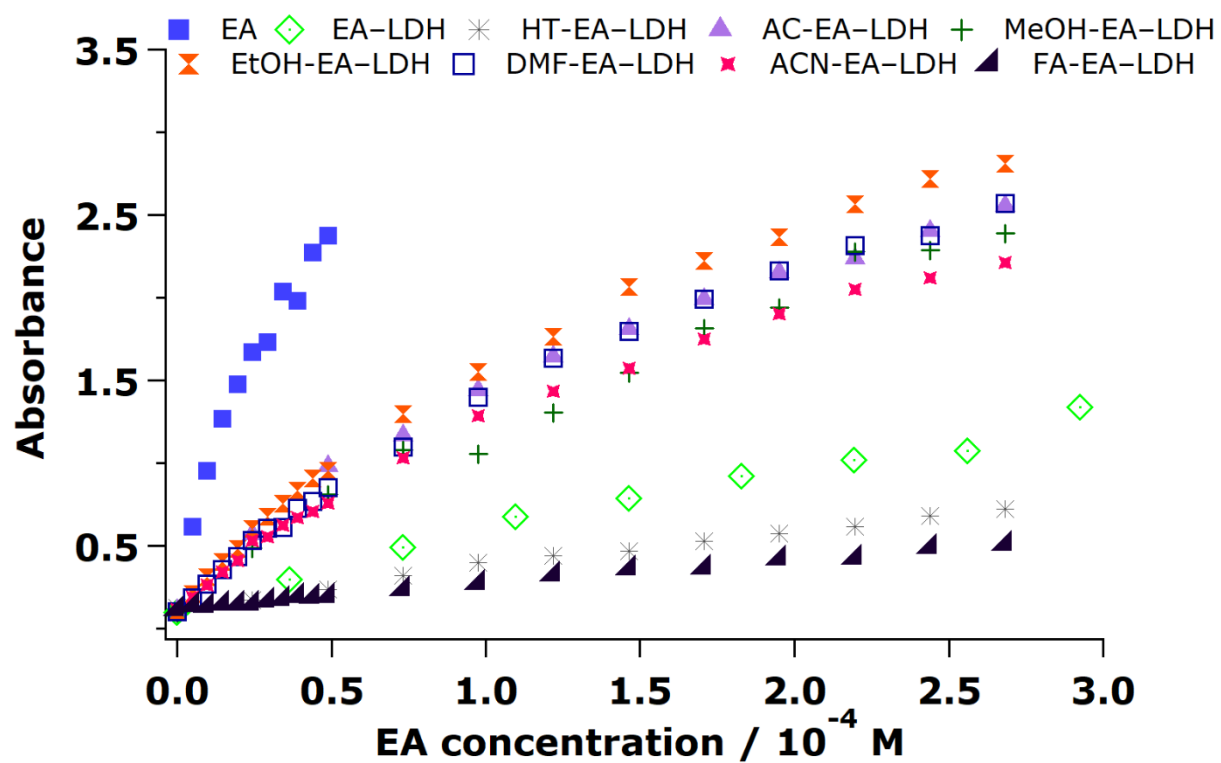

**Figure S8.** The activity of the materials investigated in CuPRAC assay, as expressed in concentration dependent absorbance values measured at 450 nm. Measurements have an error of about 4%.

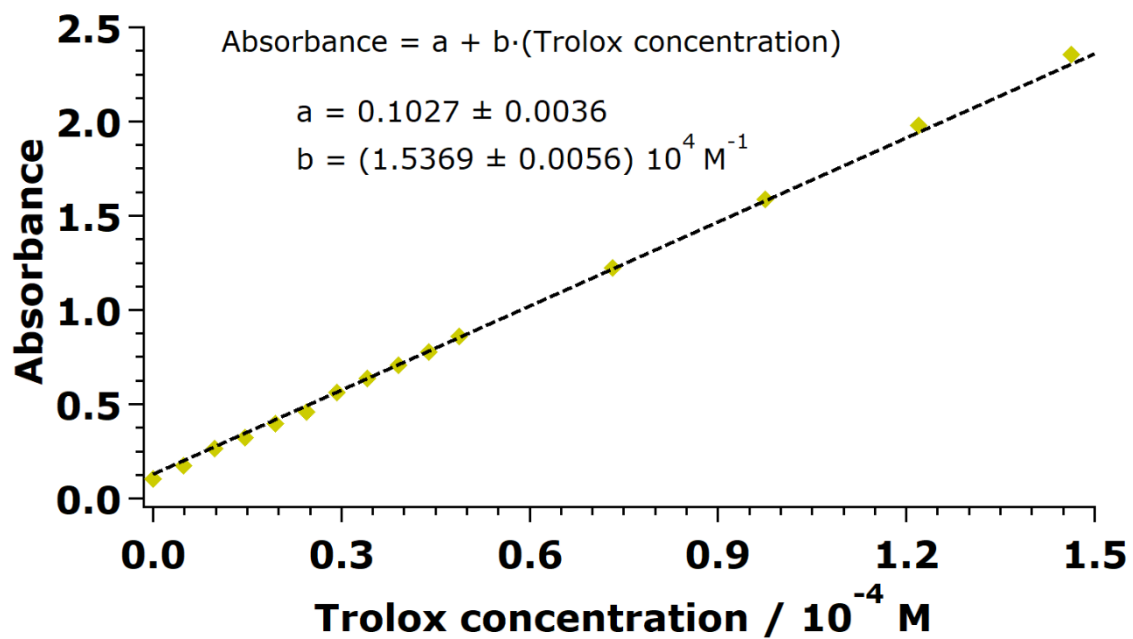

**Figure S9.** The reference activity of Trolox in CuPRAC assay expressed by the concentration dependent absorbance values.
